# Supplementary material
Source: PubMed Central journal article supplement (PMC2840477)
Supplement: 0911262107_pnas.0911262107_SI.pdf [file 0911262107_pnas.0911262107_SI.pdf]

# Supporting Information

Lee et al. 10.1073/pnas.0911262107

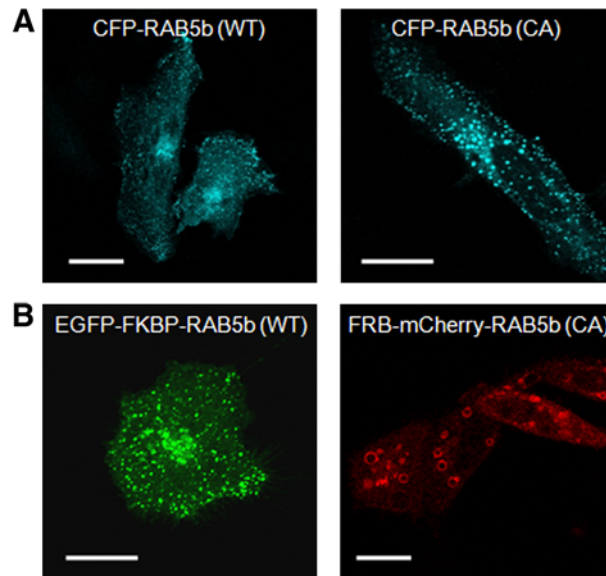

**Fig. S1.** Selection of endosome anchor. (A) Wild-type and constitutively active forms of Rab5b were expressed in HeLa cells. Constitutively active Rab5b enhanced the size and number of endosomes. (B) FRB-conjugated Rab5b (wild-type and constitutively active forms) proteins were expressed in HeLa cells. FRB-conjugated RAB5b was observed at large endosomes, generating a "circle". Scale bars = 10  $\mu$ m.

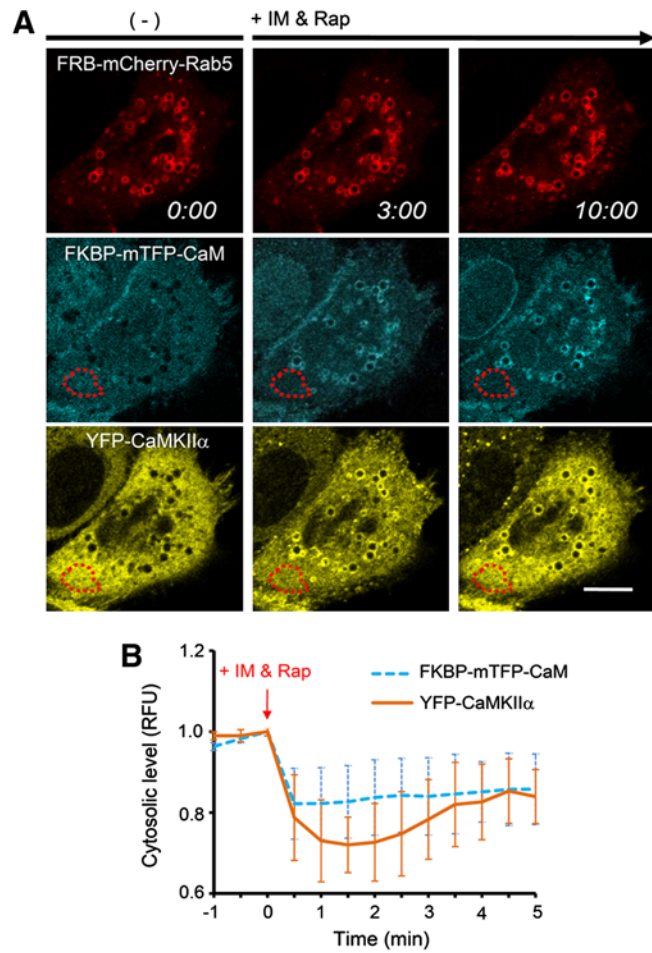

**Fig. S2.** Visualization of changes in cytosolic CaMKII $\alpha$  levels using a three-hybrid assay. Interaction between CaM kinase II $\alpha$  (YFP-CaMKII $\alpha$ ) and calmodulin (FKBP-mTFP-CaM). Following induction with 500 nM rapamycin and 1  $\mu$ M ionomycin, cytosolic levels of CaMKII $\alpha$  decreased dramatically and then showed a slight recovery. (A) Images were captured prior to induction and at three and 10 min after induction. Scale bars = 10  $\mu$ m. (B) Quantitative analysis using the area surrounded by *red dots* to indicate the Region of Intensity (ROI). RFU were normalized against fluorescence before induction ( $n = 4$ ; error bars indicate S.E.).

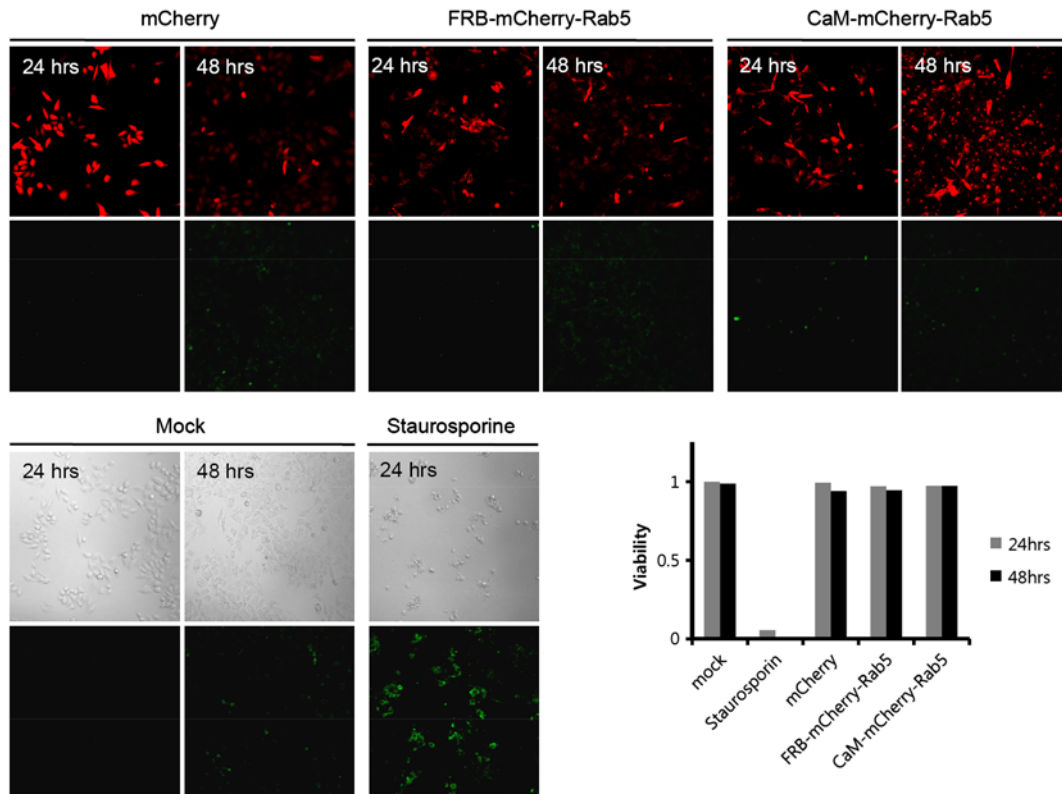

**Fig. S3.** Cytotoxicity test during ECLISPE assay. The transfected cells with mCherry, FRB-mCherry-Rab5 and CaM-mCherry-Rab5 was stained by Annexin V-FITC. The cell as positive control was treated by 1  $\mu$ M of staurosporine for 24 hrs. The viability was calculated by the ratio of nonlabeled cell to total cells. At least 300 cells were counted for each set.

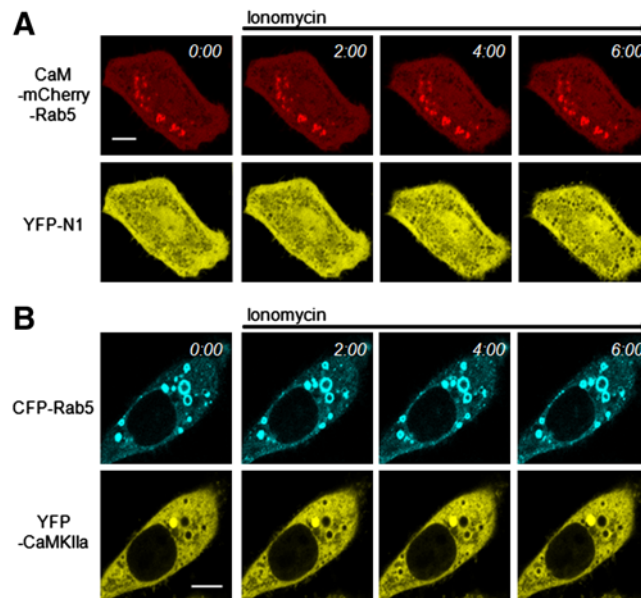

**Fig. S4.** Negative control experiments to verify that endosomal localization of CaM-binding proteins requires  $\text{Ca}^{2+}$ -dependent interactions. Induction with 1  $\mu$ M ionomycin. No prey localization was observed in the absence of calmodulin-binding proteins (A) or calmodulin (B). Only HeLa cells containing both calmodulin and calmodulin-binding proteins showed localization of prey. Scale bars = 10  $\mu$ m.



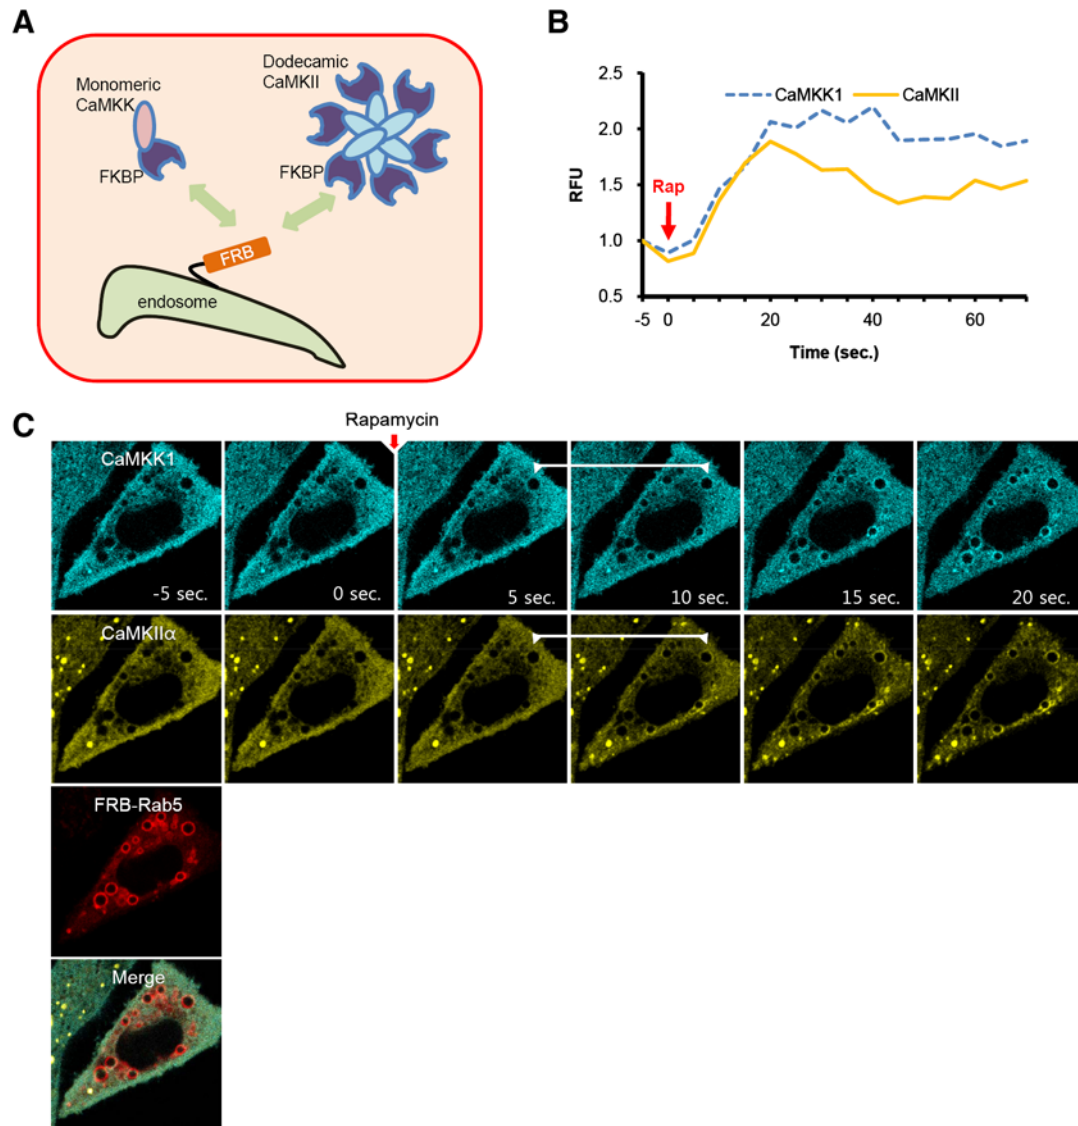

**Fig. S7.** The alternative test for comparing mobility caused from bulkiness. (A) Schematic concept of assay. When the same leading force (FKBP-FRB interaction by rapamycin) cause the endosomal location of two proteins which have different bulkiness from each other, their movements can be compared. From the assay with monomeric CaMKK1 and dodecameric CaMKII $\alpha$ , two kinds of proteins recruited to the endosome at same time: quantitative analysis (B) and images (C). The addition of rapamycin was considered to be time = 0 min. RFU were normalized against the fluorescence before induction.

**Table S1. Primers used**

|                    |                                                     |
|--------------------|-----------------------------------------------------|
| FKBP-Forward       | 5'-ATGCTCGCTAGCCACCATGGGAGTGCAGGTGG-3'              |
| FKBP-Reverse       | 5'-ATGCTCACCGGTGCTTCCAGTTTTAGAAGTCCAC AT-3'         |
| FRB-Forward        | 5'-GACTGCTAGCCCACCATGGCCTCTACCC-3'                  |
| FRB-Reverse        | 5'-GACTACCGGTAGGGCGCCGGCGCCGCCCTTTGAGATTCGTGGAAC-3' |
| WASP(CRIB)-Forward | 5'-GACTCTCGAGCCACCATGAAGAAGAAGATCAGCAAAGC-3'        |
| WASP(CRIB)-Reverse | 5'-GACTGGATCCTTGGCGCCGGCGCCGAGAGGTCTCGGCGTCGG-3'    |
| CaM-Forward        | 5'-GACTCTCGAG CTCCGCCAT GGCTGAC-3'                  |
| CaM-Reverse        | 5'-GACTGGATCCTTGGCGCCGGCGCCCTTTGCAGTCATCATCTGTAC-3' |



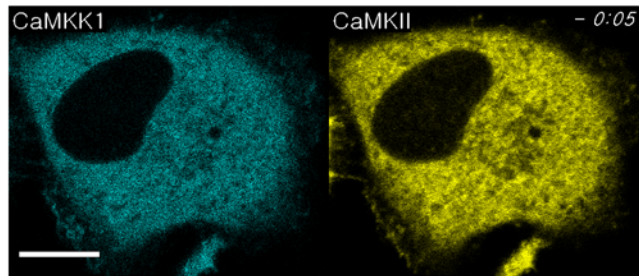

**Movie S4.** The sequential interaction of CaMKII $\alpha$  and CaMKK1 to calmodulin. It was visualized the interactions of CaMKK1 and CaMKII $\alpha$  to calmodulin in a single cell. Two kinases showed different initial rates of colocalization and CaMKK1 bound calmodulin faster than CaMKII $\alpha$  in response of 1  $\mu$ M of ionomycin.

[Movie S4 \(GIF\)](#)
